# Supplementary material
Source: publisher figshare collection journal article supplement (https://tandf.figshare.com/ndownloader/files/17447087)
Supplement: Supplementary file 1 [file 17447087]

**Superparamagnetic nanocomposites derived from waste polyurethane foam for the removal of Rhodamine B: Batch and Continuous Column studies**

**Legend for figures**

Fig. S1 XRD pattern of PUAC-Fe3O4 nanocomposites

Fig. S2 Langmuir and Freundlich isotherm plot for the adsorption of RB onto PUAC-Fe3O4 nanocomposites at 288K (adsorbent dosage = 0.25 g/50 mL; pH 8 ; T = 288 K; t =2 4h; agitation speed =100rpm)

Fig. S3 Langmuir and Freundlich isotherm plot for the adsorption of RB onto PUAC-Fe3O4 nanocomposites at 323K (adsorbent dosage = 0.25 g/50 mL; pH 8 ; T = 323 K; t =2 4h; agitation speed =100rpm)

Fig. S4 Pseudo-first-order plot for the adsorption of RB dye onto PUAC-Fe3O4 nanocomposites (adsorbent dosage = 1.5 g/150 mL; pH 8; T = 300 K; agitation speed = 150rpm)

Fig. S1

Fig. S2

Fig. S3

Fig. S4
